# Supplementary material for: Polyaniline superstructures created by a templating effect of organogels
Source: Royal Society of Chemistry journal article supplement (doi:10.1039/b408893j), 2004-01-01
Supplement: b408893j.pdf [file b408893j.pdf]

**Supplementary Information for**

**Polyaniline superstructures created by a templating effect of organogels**

**Chun Li, Tsukasa Hatano, Masayuki Takeuchi and Seiji Shinkai\***

*Department of Chemistry and Biochemistry, Graduate School of Engineering, Kyushu University,  
Fukuoka 812-8581, Japan.*

*Email: seijitcm@mbox.nc.kyushu-u.ac.jp; Fax: +81-92-642-3611; Tel: +81-92-642-3583*

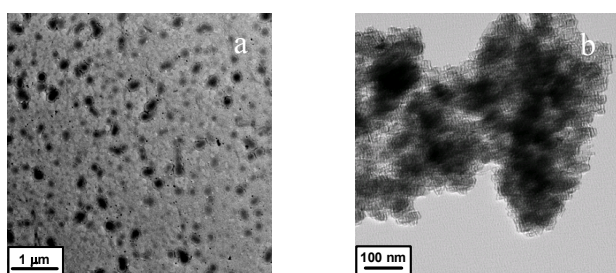

Fig. S1 TEM images of SPAN/1 xerogel (a) and SPAN/2 cast film from DMSO solution (b) without staining: [1] = 1.5 wt% and molar ratio of SPAN to **2** and **1** is 2:1:5.

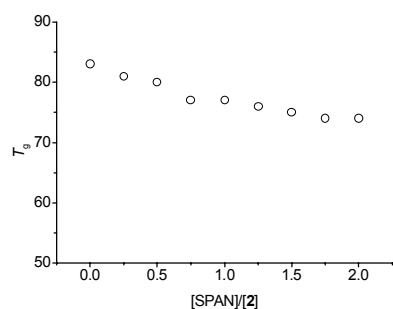

Fig. S2 Sol-gel transition temperatures ( $T_g$ ) of SPAN/2/1 gels prepared from DMSO: [1] = 1.5 wt% and molar ratio of **2** to **1** is 1:5.
